# Supplementary material for: Formation of buried superconducting Mo2N by nitrogen-ion-implantation
Source: Royal Society of Chemistry journal article supplement (doi:10.1039/d0ra08533b), 2020-01-01
Supplement: d0ra08533b1.pdf [file d0ra08533b1.pdf]

## Supplementary Material

### Formation of buried superconducting Mo<sub>2</sub>N by nitrogen-ion-implantation

Joonhyuk Lee,<sup>a</sup> Jun Kue Park,<sup>b</sup> Joon Woo Lee,<sup>c</sup> Yunseok Heo,<sup>a</sup> Yoon Seok Oh,<sup>c</sup> Jae S. Lee,<sup>b</sup>  
Jinhyung Cho,<sup>d</sup> and Hyoungjeen Jeon<sup>\*a</sup>

<sup>a</sup>Department of Physics, Pusan National University, Busan 46241, Korea.; E-mail: hjeen@pusan.ac.kr

<sup>b</sup>Korea Multi-Purpose Accelerator Complex, Korea Atomic Energy Research Institute, Gyeongju 38180, Korea

<sup>c</sup>Department of Physics, Ulsan National Institute of Science and Technology, Ulsan 44919, Korea

<sup>d</sup>Department of Physics Education, Pusan National University, Busan 46241, Korea

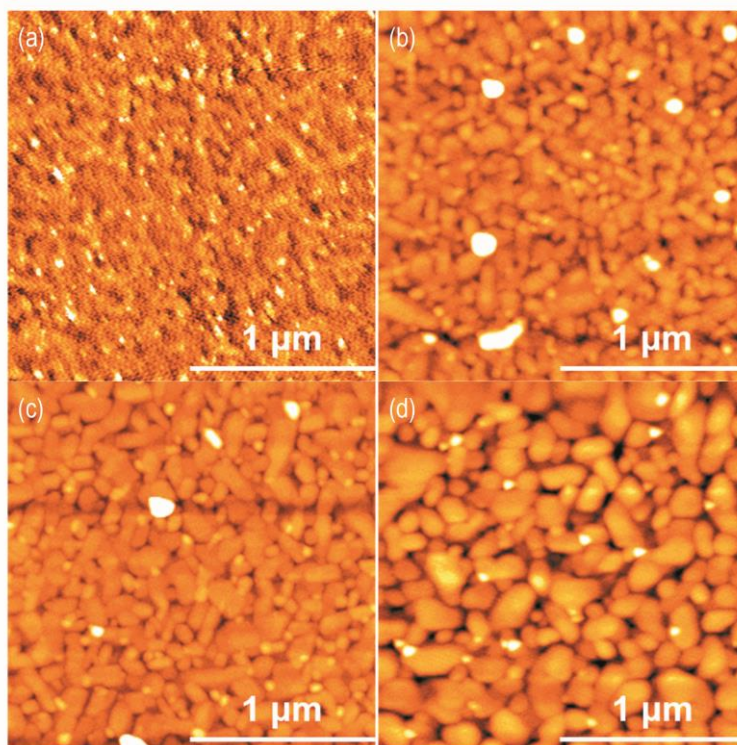

**Figure S1** AFM images of (a) as-grown Mo film and nitrogen-ion implanted Mo films with different doses: (b)  $10^{15}$  ions/cm<sup>2</sup>, (c)  $10^{16}$  ions/cm<sup>2</sup>, (d)  $5 \times 10^{16}$  ions/cm<sup>2</sup>. The r.m.s roughness values are 0.58 nm from an as-grown Mo film, 2.47 nm from the implanted film with  $10^{15}$  ions/cm<sup>2</sup>, 1.87 nm from the implanted film with  $10^{16}$  ions/cm<sup>2</sup>, and 1.66 nm from the implanted film with  $5 \times 10^{16}$  ions/cm<sup>2</sup>. It can be interpreted as surface damage at the lower dose and the grain growth and surface smoothing due to prolonged heating driven by ion implantation.

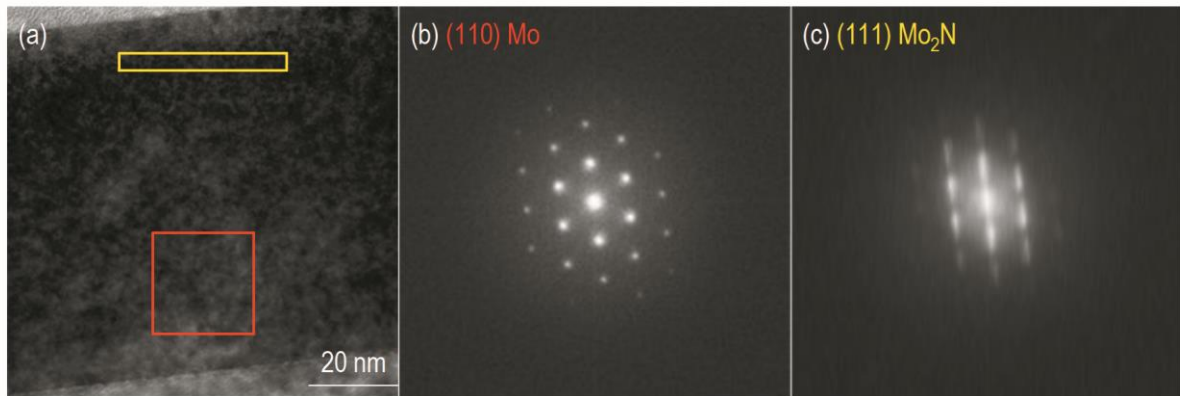

**Figure S2** (a) cross-sectional TEM image of nitrogen-ion implanted Mo film with  $5 \times 10^{16}$  ions/cm<sup>2</sup> and fast Fourier transformation (FFT) of (b) (110) Mo film and FFT of (c) (111)  $\gamma$ -Mo<sub>2</sub>N layer. The zone axes are  $[-1\ 1\ -1]$  of Mo and  $[0\ -1\ 1]$  of  $\gamma$ -Mo<sub>2</sub>N, which are matched with the simulation software (Single Crystal, UK). Calculating the lattice constant along [110] from the FFT of (110) Mo is 4.60 nm. This is similar to the known value (4.46 nm). The lattice constant along [111]  $\gamma$ -Mo<sub>2</sub>N is 7.159 nm, similar with the known value (7.208 nm).
